# Supplementary material for: Human Vascularized Macrophage-Islet Organoids to Model Immune-Mediated Pancreatic β cell Pyroptosis upon Viral Infection
Source: PubMed Central journal article supplement — bioRxiv. 2024 Aug 6:2024.08.05.606734. Preprint. [Version 1] doi: 10.1101/2024.08.05.606734 (PMC11326194; doi:10.1101/2024.08.05.606734), 2024-08-06
Supplement: media-1.pdf [file media-1.pdf]

**Figure S1**

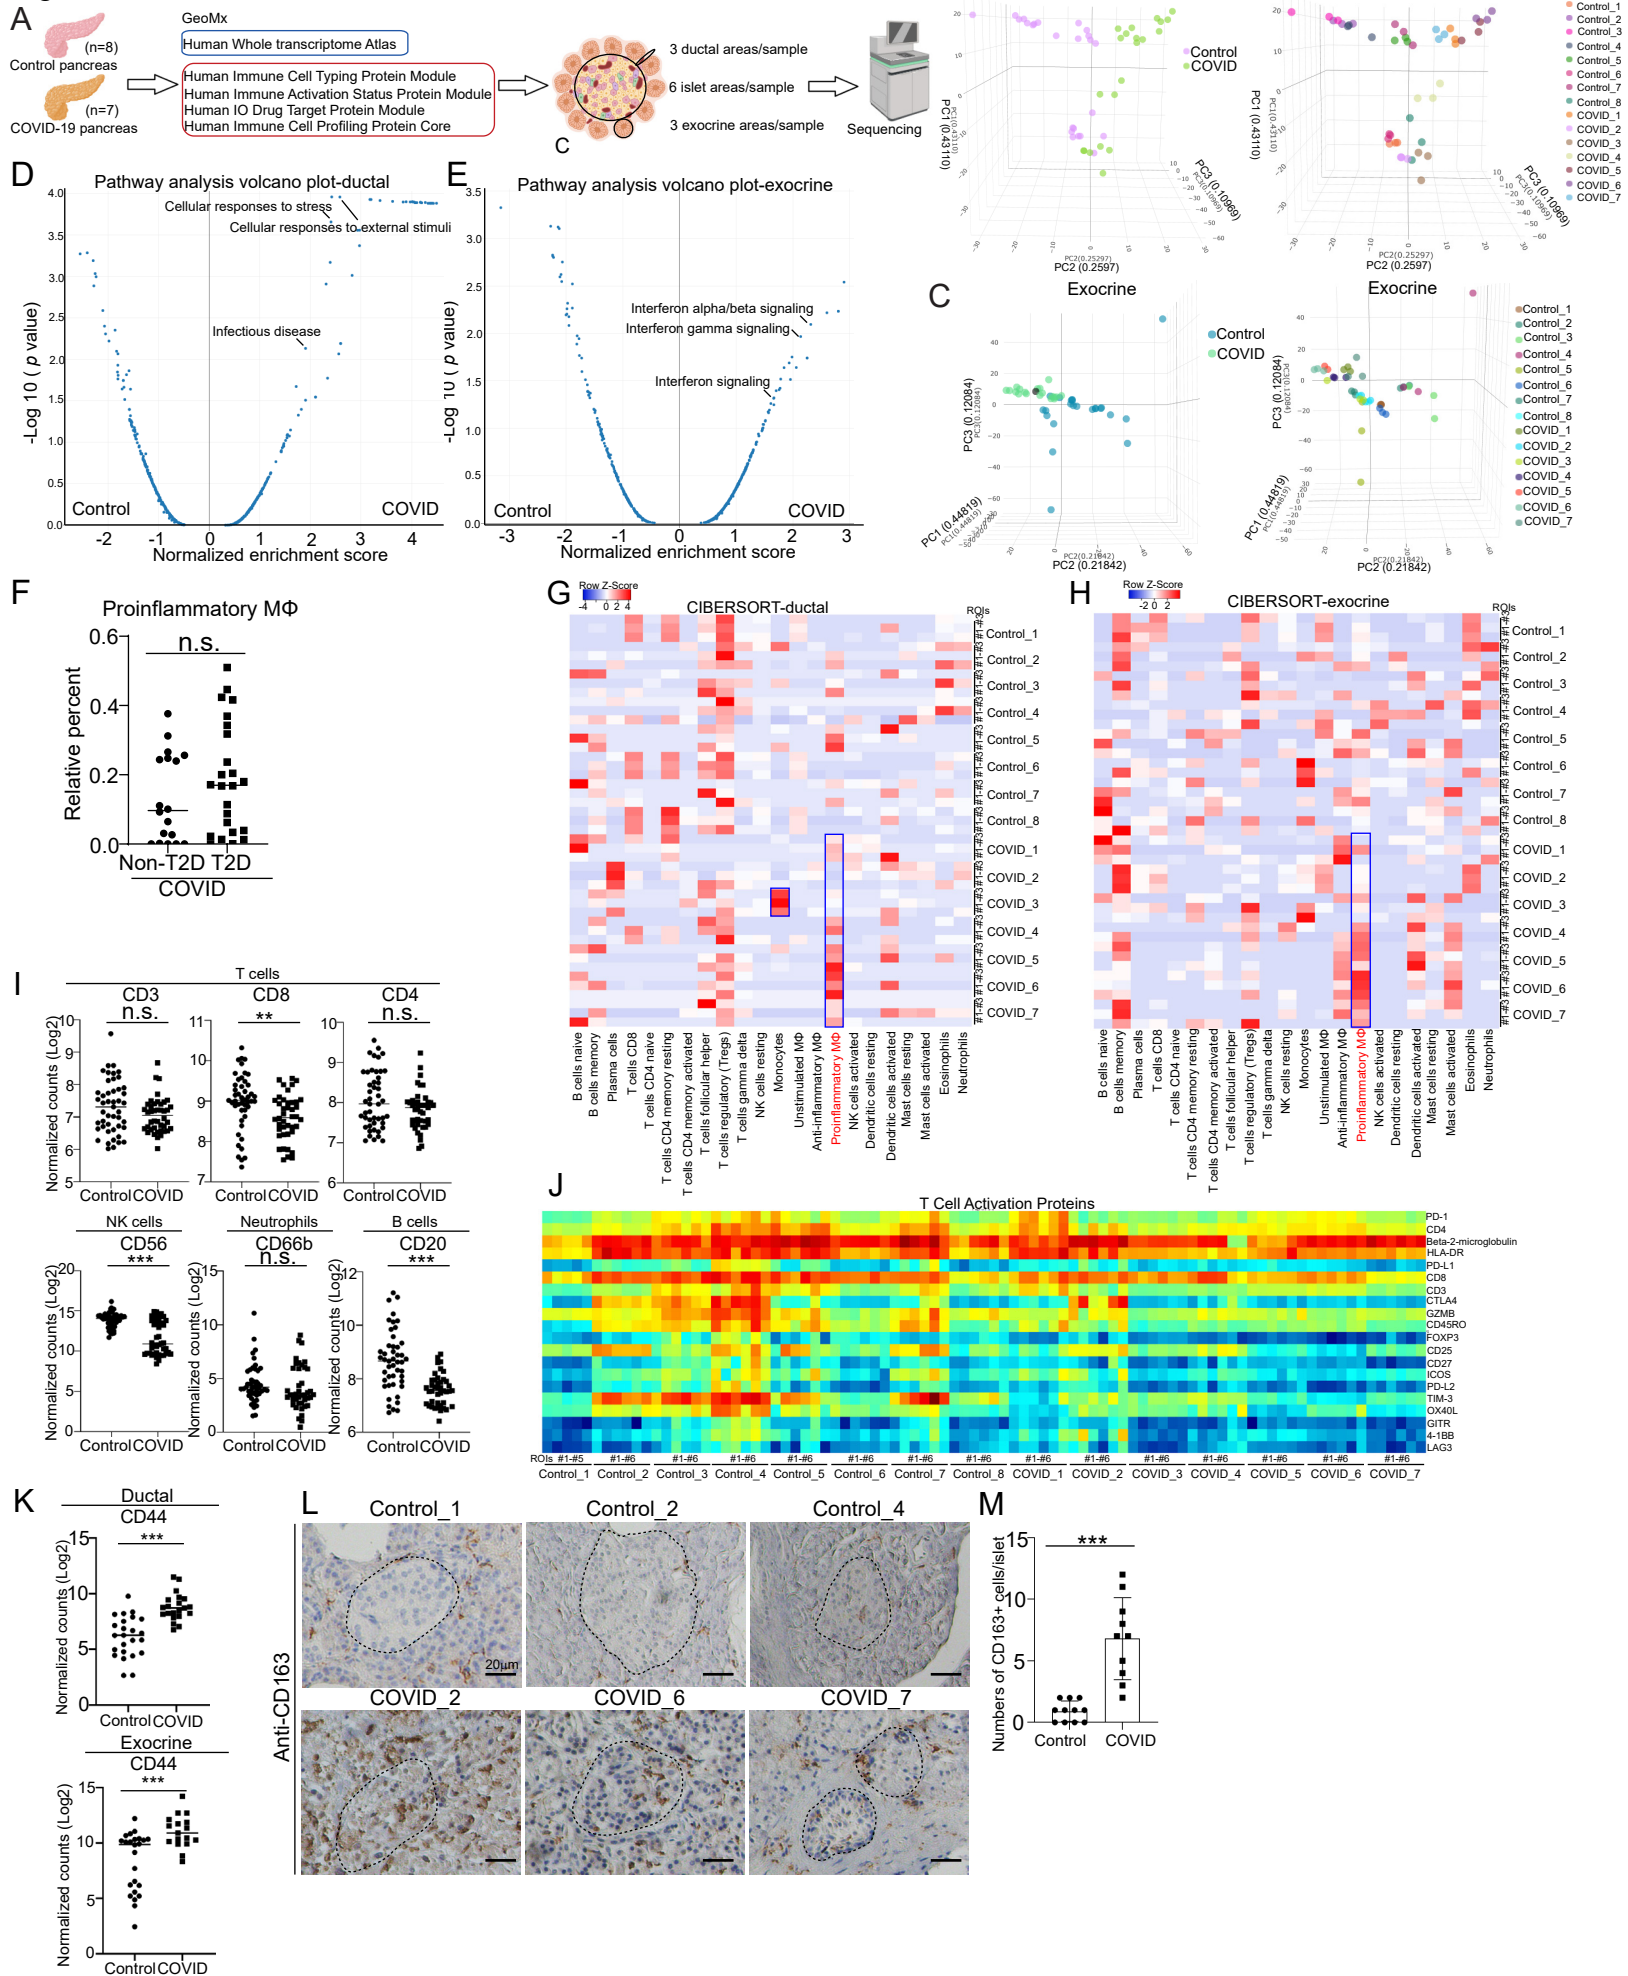

## SUPPLEMENTAL INFORMATION

**Figure S1. GeoMx spatial transcriptomics and protein analysis of pancreatic autopsy samples from control and COVID-19 subjects. Related to Figure 1.**

**(A)** Schematic representation of GeoMx spatial transcriptomics and protein analysis.

**(B and C)** 3D PCA plots of GeoMx whole transcriptome sequencing data from ROIs of human ductal (B) and exocrine (C) areas of COVID-19 (N=7) and control (N=8) pancreatic autopsy samples.

**(D and E)** Volcano plot highlighting the pathways enriched in transcriptome sequencing data from ROIs of human ductal (D) and exocrine (E) areas of COVID-19 (N=7) and control (N=8) pancreatic autopsy samples.

**(F)** Relative percent of proinflammatory macrophages from the CIBERSORT analysis of immune cells (LM22) using the GeoMx whole transcriptome sequencing data of human islet areas in non-T2D or T2D COVID-19 pancreatic autopsy samples. Each dot represents one count in each ROI.

**(G)** Heatmap of the CIBERSORT analysis of immune cells (LM22) using the GeoMx whole transcriptome sequencing data from ROIs of human ductal areas of COVID-19 (N=7) and control (N=8) pancreatic autopsy samples.

**(H)** Heatmap of the CIBERSORT analysis of immune cells (LM22) using the GeoMx whole transcriptome sequencing data from ROIs of human exocrine areas of COVID-19 (N=7) and control (N=8) pancreatic autopsy samples.

**(I)** Normalized counts (Log2) of immune cell markers, including CD3, CD8 and CD4 for T cells, CD56 for NK cells, CD66b for neutrophils and CD20 for B cells, in ROIs of the islet areas of control (N=8) and COVID-19 (N=7) pancreatic autopsy samples. Each dot represents one count in each ROI.

**(J)** Heatmap of the proteins related to T cell activation examined by GeoMx protein assay from ROIs of human islet areas of COVID-19 (N=7) and control (N=8) pancreatic autopsy samples.

**(K)** Normalized counts (Log2) of CD44 in the ductal or exocrine areas of control (N=8) and COVID-19 (N=7) pancreatic autopsy samples. Each dot represents one count in each ROI.

**(L and M)** Immunohistochemistry staining (L) and quantification (M) of CD163 in COVID-19 (N=3) and control (N=3) pancreatic autopsy samples. Dotted lines encircled the regions of the islets. Scale bar=20  $\mu\text{m}$ .

*P* values were calculated by unpaired two-tailed Student's *t* test. n.s., no significance, \*\**P* < 0.01, \*\*\**P* < 0.001.

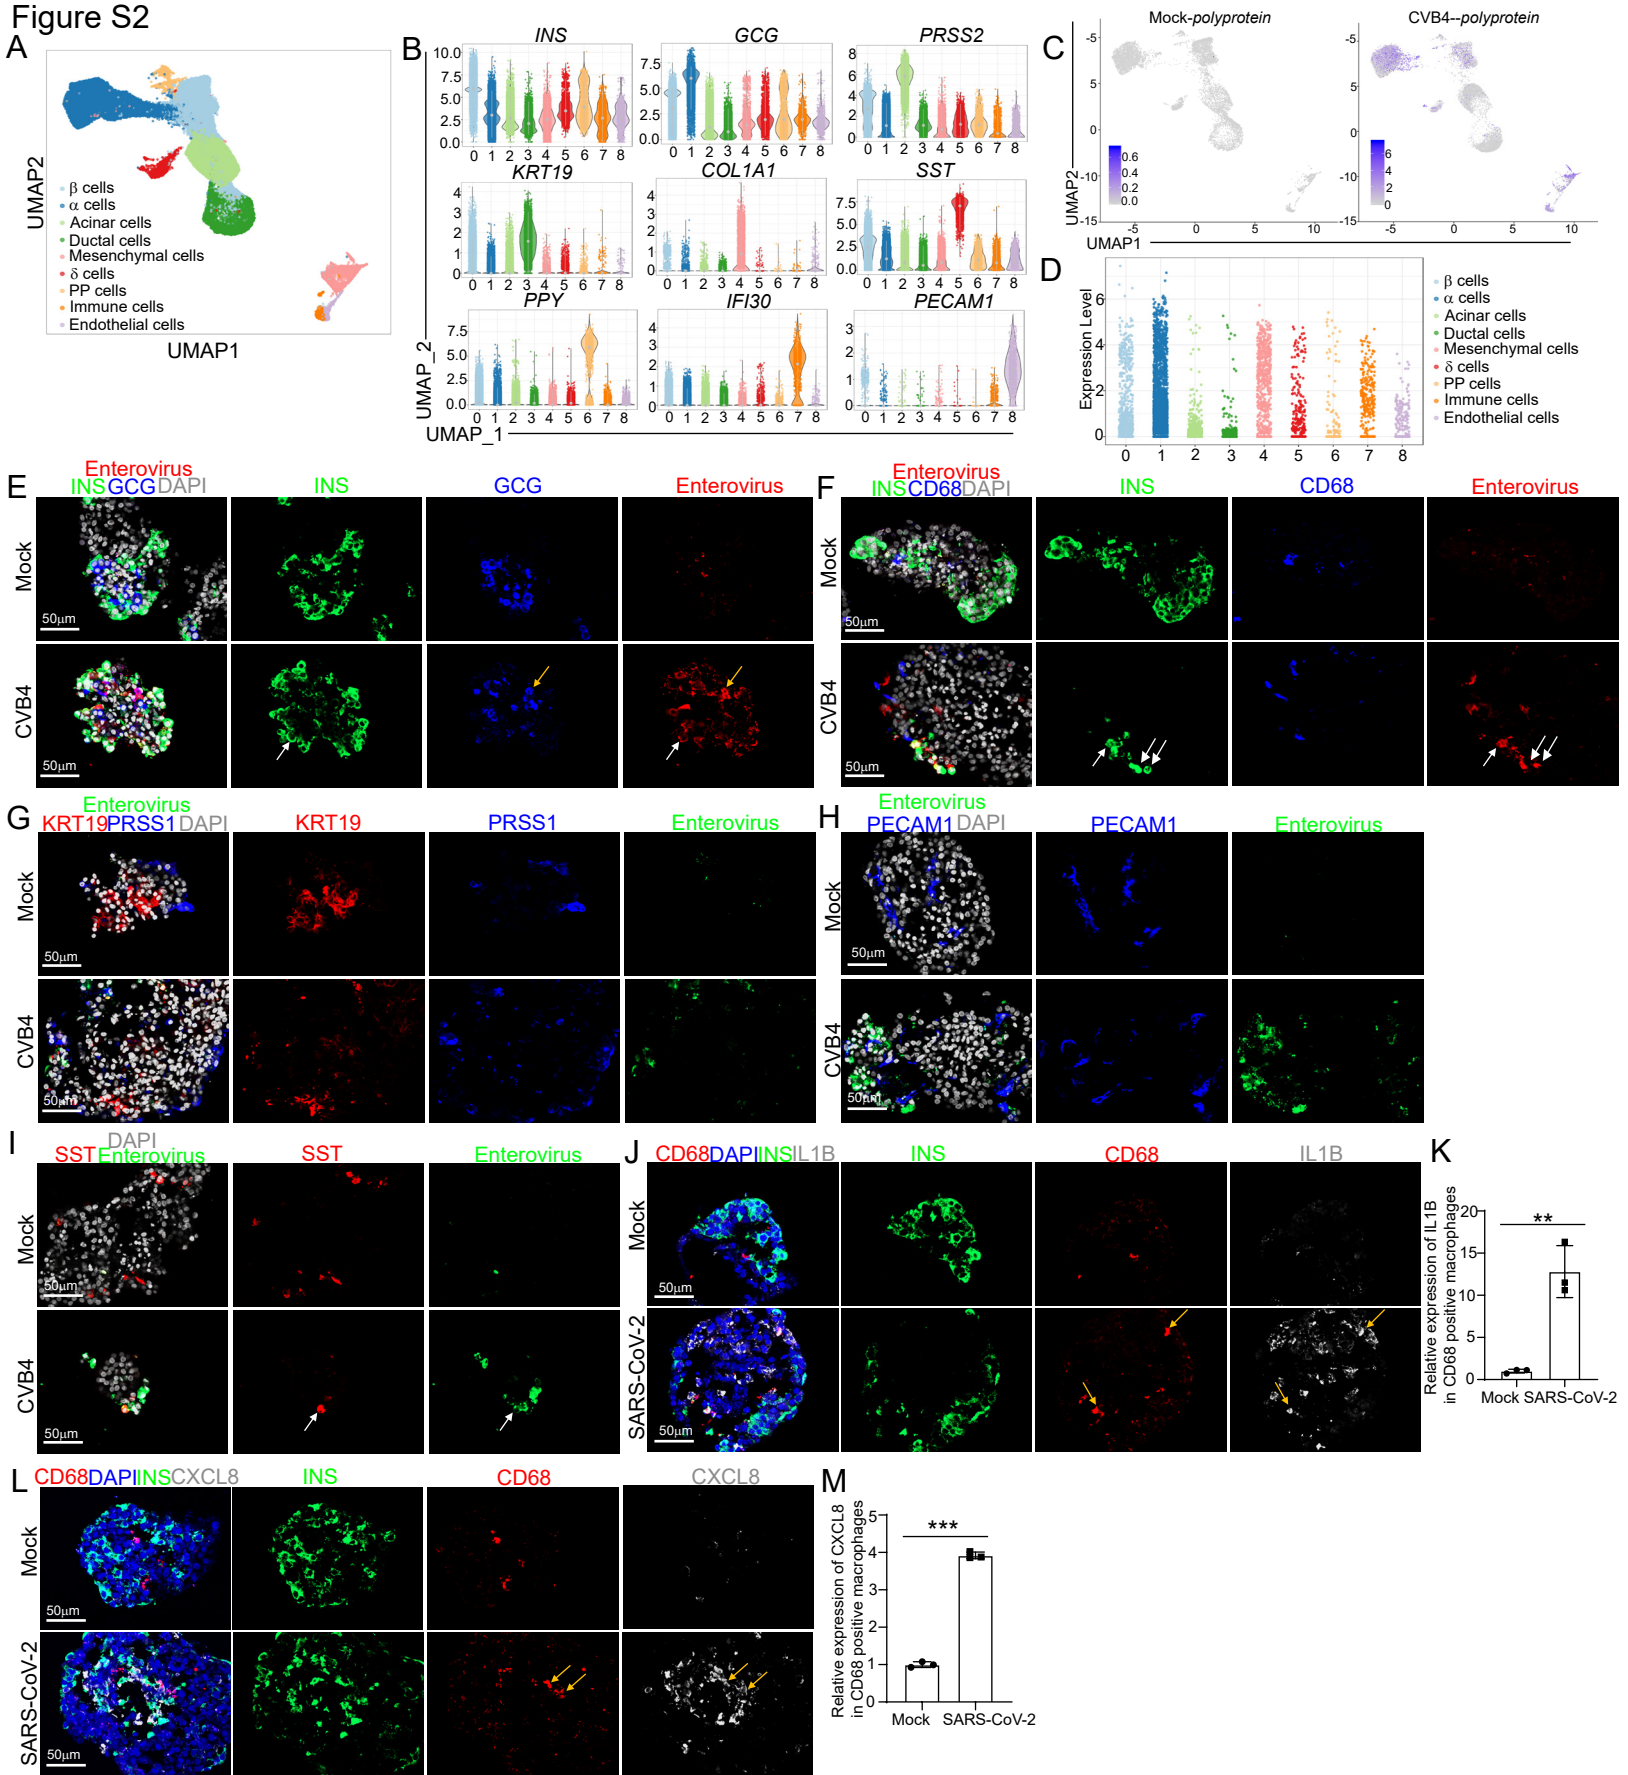

**Figure S2. CVB4 infects human islets and induces activation of proinflammatory macrophages. Related to Figure 2.**

**(A)** UMAP of human islets exposed to mock, SARS-CoV-2 (MOI=1) or CVB4 ( $2 \times 10^6$  PFU/ml) viruses.

**(B)** Violin plot of cell markers of each cell population, including *INS*, *GCG*, *PRSS2*, *KRT19*, *COL1A1*, *SST*, *PPY*, *IFI30*, and *PECAM1*.

**(C)** UMAP showed the expression of CVB4-*polyprotein* in human islets exposed to mock or CVB4 ( $2 \times 10^6$  PFU/ml) virus.

**(D)** Jitter plot showed the expression of CVB4-*polyprotein* in human islets exposed to mock or CVB4 ( $2 \times 10^6$  PFU/ml) virus.

**(E)** Confocal images of Enterovirus (CVB4) antigen expression in *INS*<sup>+</sup>  $\beta$  cells, *GCG*<sup>+</sup>  $\alpha$  cells of human islets exposed to mock or CVB4 ( $2 \times 10^6$  PFU/ml). The white arrows highlight the co-localization of *INS* and Enterovirus antigen. The yellow arrows highlight the co-localization of *GCG* and Enterovirus antigen. Scale bar= 50  $\mu$ m.

**(F)** Confocal images of Enterovirus (CVB4) antigen expression in *INS*<sup>+</sup>  $\beta$  cells, *CD68*<sup>+</sup> macrophages of human islets exposed to mock or CVB4 ( $2 \times 10^6$  PFU/ml). The white arrows highlight the co-localization of *INS* and Enterovirus antigen. Scale bar= 50  $\mu$ m.

**(G)** Confocal images of Enterovirus (CVB4) antigen expression in KRT19<sup>+</sup> ductal cells, PRSS1<sup>+</sup> acinar cells of human islets exposed to mock or CVB4 (2x10<sup>6</sup> PFU/ml). Scale bar= 50 μm.

**(H)** Confocal images of Enterovirus (CVB4) antigen expression in PECAM1<sup>+</sup> endothelial cells of human islets exposed to mock or CVB4 (2x10<sup>6</sup> PFU/ml). Scale bar= 50 μm.

**(I)** Confocal images of Enterovirus (CVB4) antigen expression in SST<sup>+</sup> δ cells of human islets exposed to mock or CVB4 (2x10<sup>6</sup> PFU/ml). The white arrows highlight the co-localization of SST and Enterovirus antigen. Scale bar= 50 μm.

**(J and K)** Confocal images (J) and quantification (K) of IL1B expression in CD68<sup>+</sup> macrophages of human islets exposed to mock or SARS-CoV-2 (MOI=0.5). The yellow arrows highlight the co-localization of CD68 and IL1B. Scale bar= 50 μm.

**(L and M)** Confocal images (L) and quantification (M) of CXCL8 expression in CD68<sup>+</sup> macrophages of human islets exposed to mock or SARS-CoV-2 (MOI=0.5). The yellow arrows highlight the co-localization of CD68 and CXCL8. Scale bar= 50 μm.

*P* values were calculated by unpaired two-tailed Student's *t* test. \*\**P* < 0.01, \*\*\**P* < 0.001.

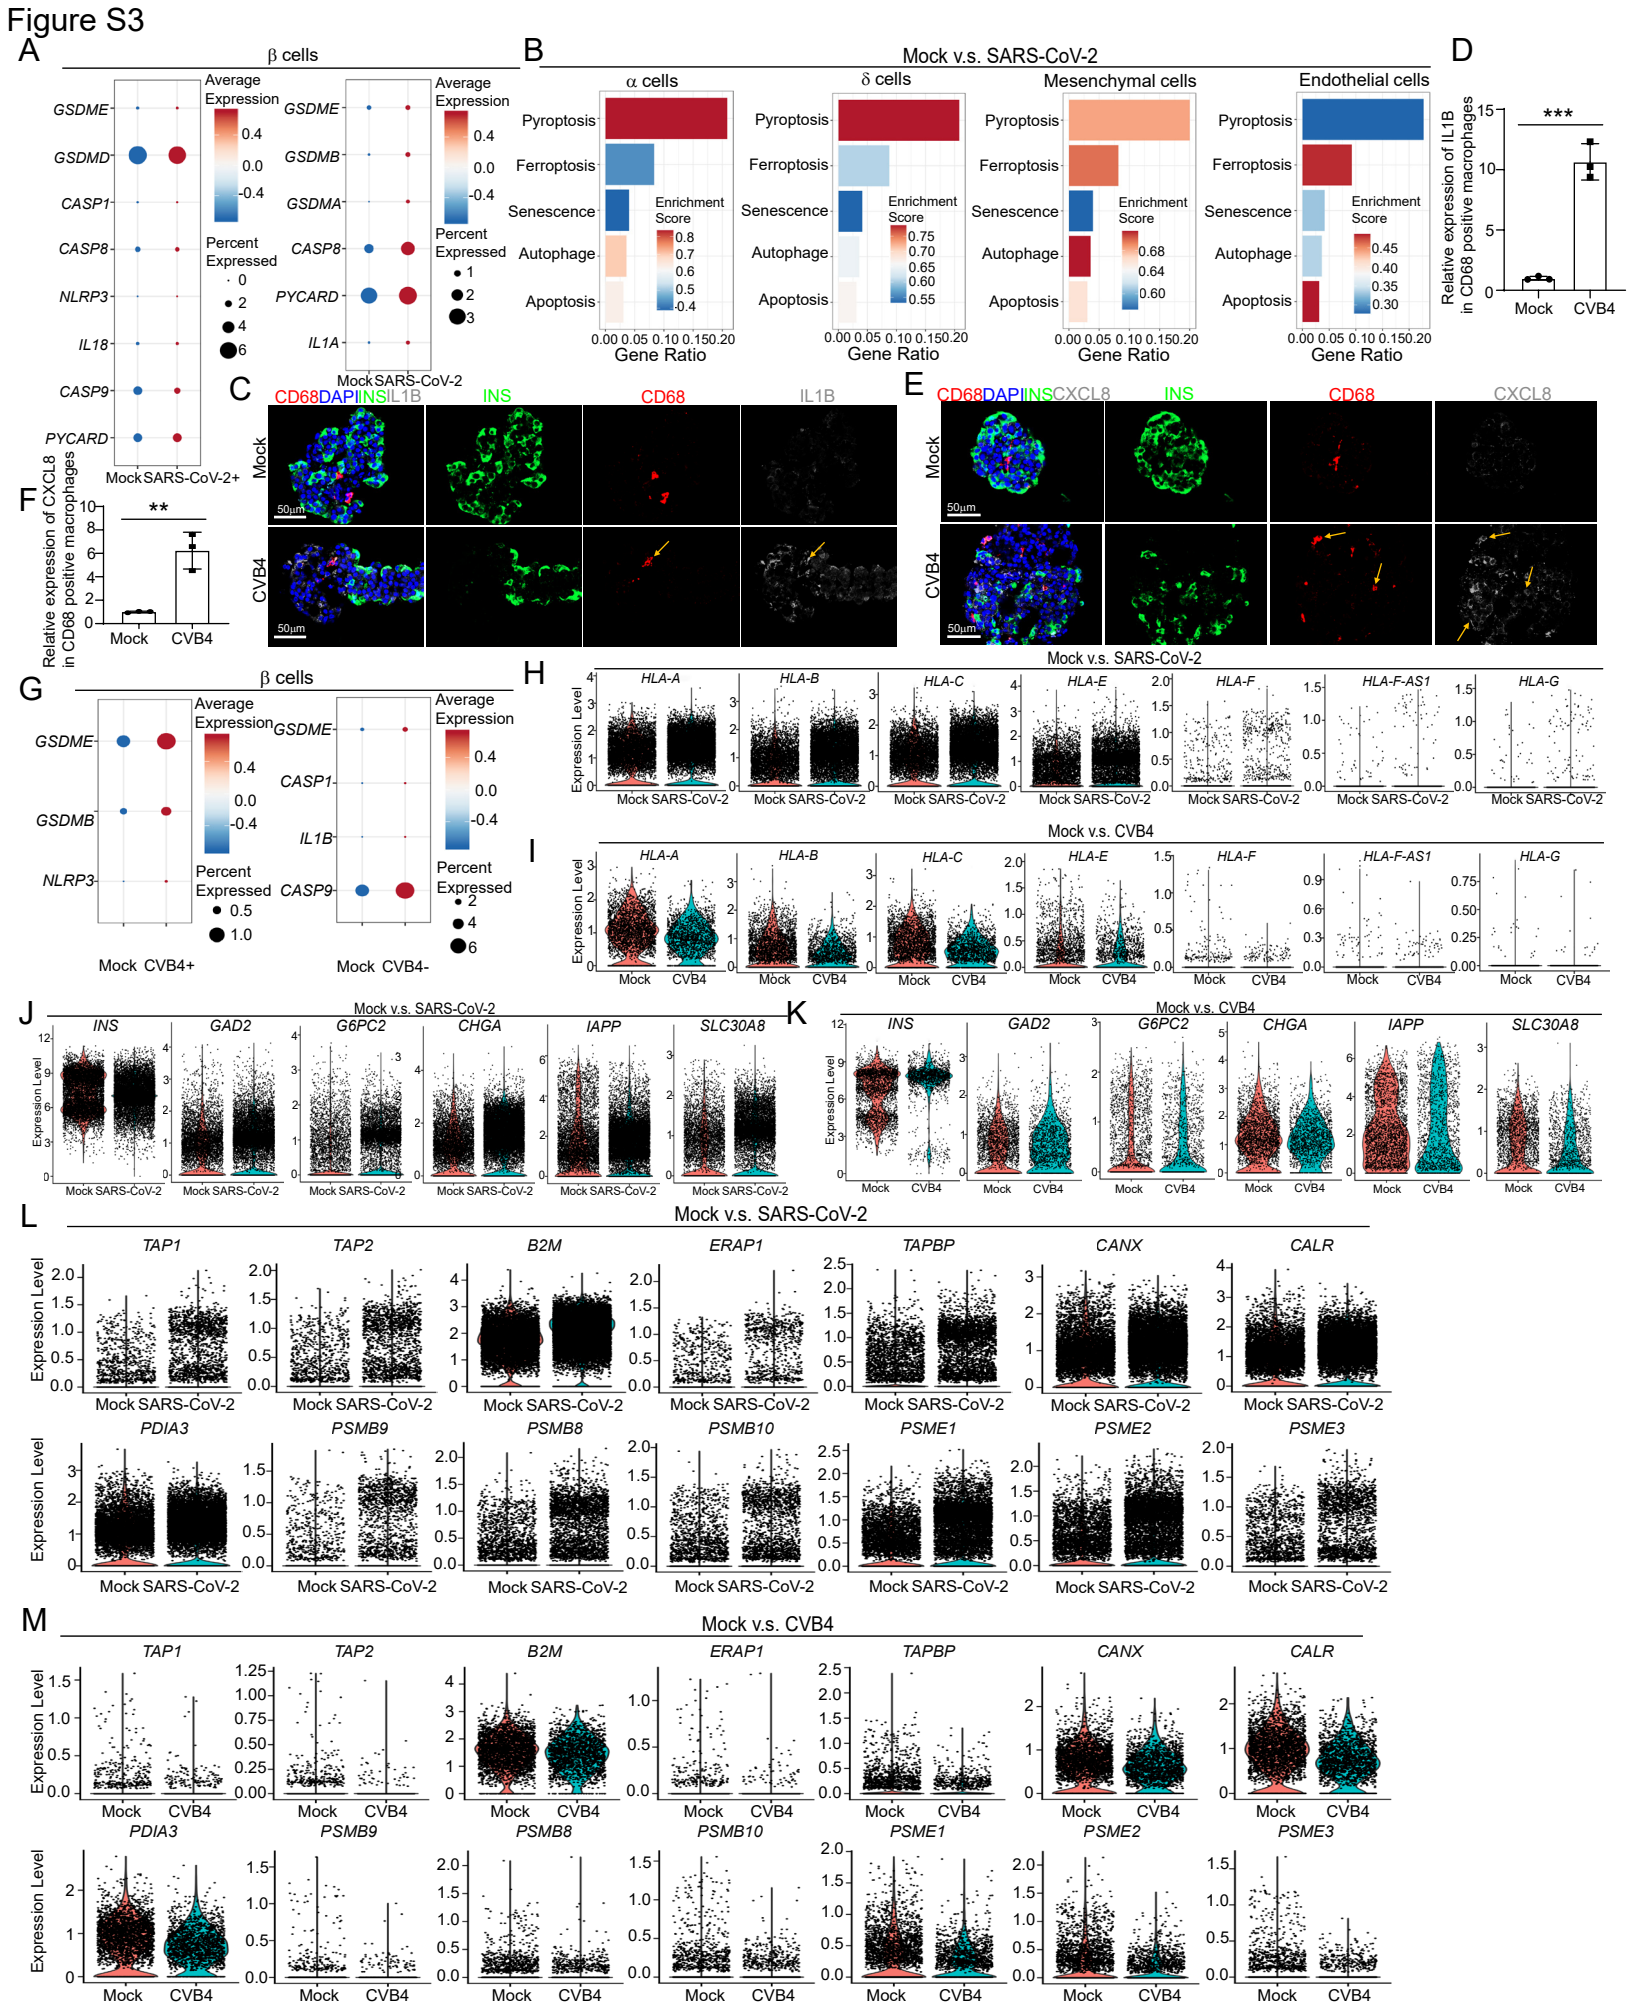

**Figure S3. Single cell RNA-seq analysis of human islets upon CVB4 or SARS-CoV-2 exposure. Related to Figure 2.**

**(A)** Dot plot analysis of pyroptosis pathway associated genes in virus<sup>+</sup>  $\beta$  cell cluster and virus<sup>-</sup>  $\beta$  cell cluster of human islets upon mock or SARS-CoV-2 exposure (MOI=1).

**(B)** Pathway enrichment analysis of cell death pathways in  $\alpha$ ,  $\delta$ , mesenchymal and endothelial cell clusters of human islets exposed to mock or SARS-CoV-2 (MOI=1).

**(C and D)** Confocal images (C) and quantification (D) of IL1B expression in CD68<sup>+</sup> macrophages of human islets exposed to mock or CVB4 ( $2 \times 10^6$  PFU/ml). The yellow arrows highlight the co-localization of CD68 and IL1B. Scale bar= 50  $\mu$ m.

**(E and F)** Confocal images (E) and quantification (F) of CXCL8 expression in CD68<sup>+</sup> macrophages of human islets exposed to mock or CVB4 ( $2 \times 10^6$  PFU/ml). The yellow arrows highlight the co-localization of CD68 and CXCL8. Scale bar= 50  $\mu$ m.

**(G)** Dot plot analysis of pyroptosis pathway associated genes in virus<sup>+</sup>  $\beta$  cell cluster and virus<sup>-</sup>  $\beta$  cell cluster of human islets upon mock or CVB4 ( $2 \times 10^6$  PFU/ml).

**(H)** Violin plot of the expression of *HLA* genes in the  $\beta$  cell cluster of human islets exposed to mock or SARS-CoV-2 (MOI=1).



**(I)** Violin plot of the expression of *HLA* genes in the  $\beta$  cell cluster of human islets exposed to mock or CVB4 ( $2 \times 10^6$  PFU/ml).

**(J)** Violin plot of the expression of autoantigen genes in the  $\beta$  cell cluster of human islets exposed to mock or SARS-CoV-2 (MOI=1).

**(K)** Violin plot of the expression of autoantigen genes in the  $\beta$  cell cluster of human islets exposed to mock or CVB4 ( $2 \times 10^6$  PFU/ml).

**(L)** Violin plot of the expression of antigen presentation associated genes in the  $\beta$  cell cluster of human islets exposed to mock or SARS-CoV-2 (MOI=1).

**(M)** Violin plot of the expression of antigen presentation genes in the  $\beta$  cell cluster of human islets exposed to mock or CVB4 ( $2 \times 10^6$  PFU/ml).

*P* values were calculated by unpaired two-tailed Student's *t* test. \*\**P* < 0.01, \*\*\**P* < 0.001.

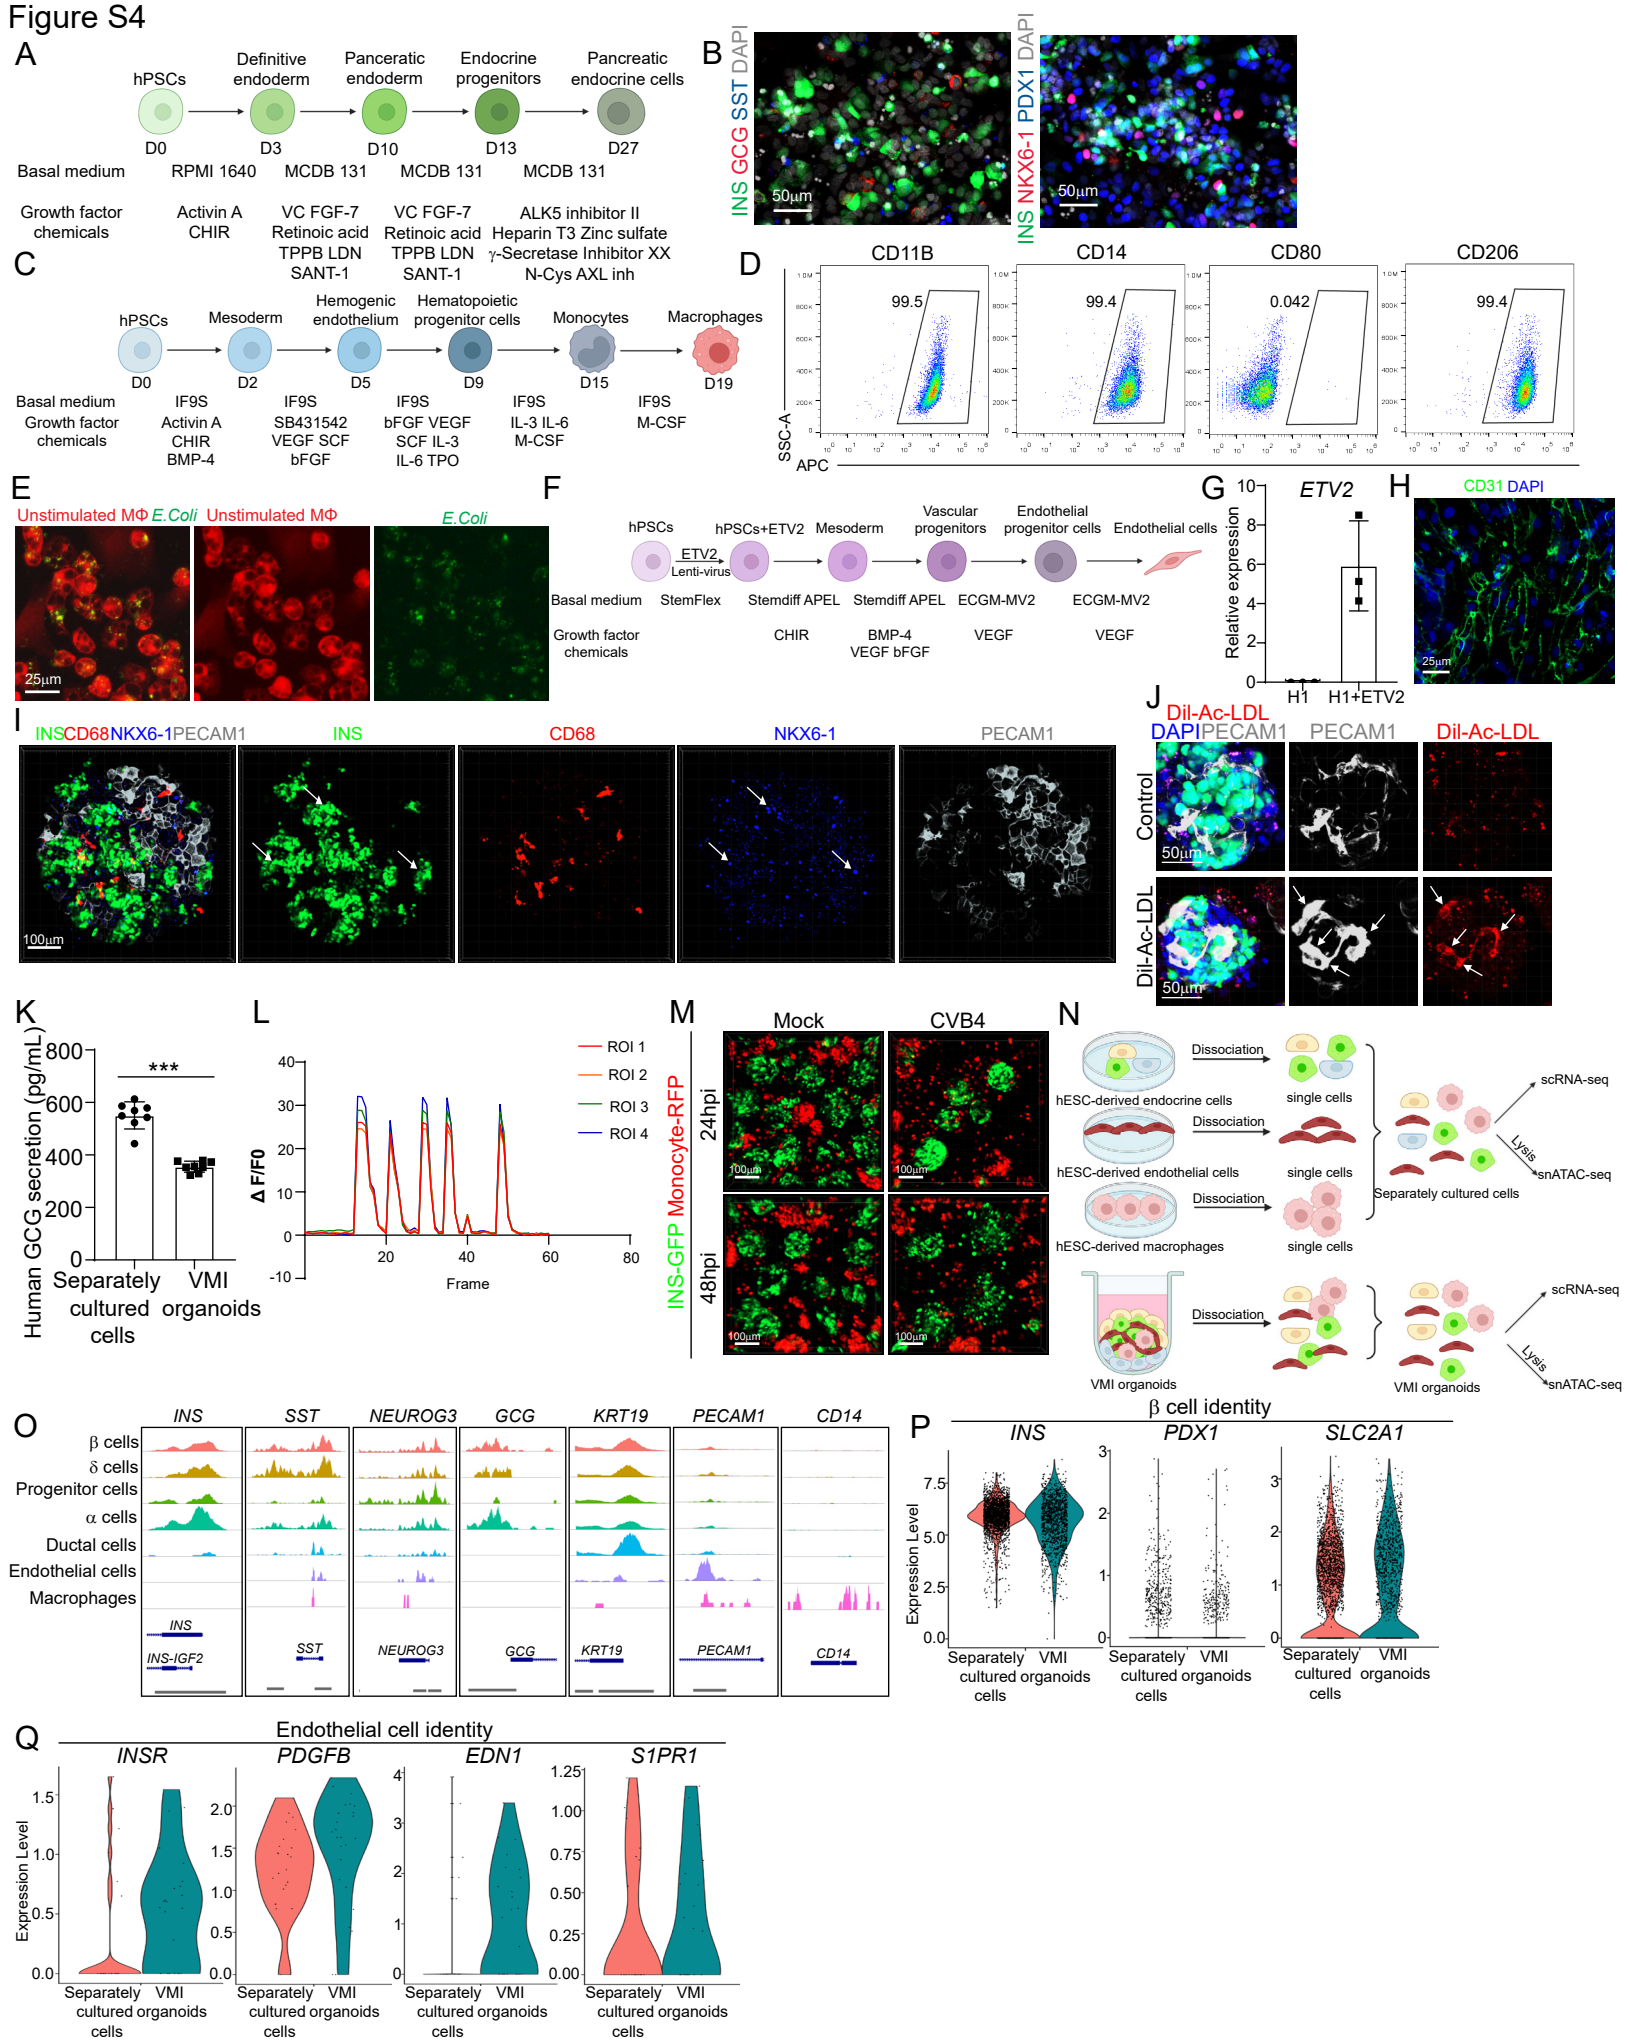

**Figure S4. Construction and characterization of hPSC-derived VMI organoids. Related to Figure 3 and Figure 4.**

**(A)** Schematic illustration of directed differentiation of hPSCs to pancreatic endocrine cells. At day 16, we detected INS-GFP<sup>+</sup> cells. Then, early stage 6 cells (day 16-day19) were co-cultured with macrophages and endothelial cells or culture separately for 7-14 days.

**(B)** Confocal images of hPSC-derived pancreatic endocrine cells stained with antibodies against INS, GCG, NKX6-1, PDX1 and SST. Scale bar= 50  $\mu$ m.

**(C)** Schematic illustration of directed differentiation of hPSCs to macrophages.

**(D)** Flow cytometry analysis of hPSC-derived unstimulated macrophages stained with antibodies against CD11B, CD14, CD80 and CD206.

**(E)** Confocal images of hPSC-derived macrophages engulfing GFP labeled *E. Coli*. Macrophages: RFP; *E. Coli*: Green. Scale bar= 25  $\mu$ m.

**(F)** Schematic illustration of directed differentiation of hPSCs to endothelial cells.

**(G)** qRT-PCR analysis to examine the expression level of *ETV2* in H1 hPSCs following forced expression of *ETV2* or control. Data was normalized to  $\beta$ -actin.

**(H)** Confocal images of hPSC-derived endothelial cells stained with antibodies against PECAM1 (CD31) and DAPI. Scale bar= 25  $\mu$ m.

**(I)** Composite Z-stack confocal images of VMI organoids at day 14 after reaggregation stained with antibodies against INS, CD68, NKX6-1 and PECAM1 (CD31). The white arrows highlight the co-localization of INS and NKX6-1. Scale bar= 100  $\mu$ m.

**(J)** Confocal images of VMI organoids stained with antibodies against PECAM1 (CD31) and Dil-Ac-LDL. Scale bar= 50  $\mu$ m.

**(K)** ELISA assay showed the secretion of GCG in VMI organoids and separately cultured endocrine cells.

**(L)** Quantification of calcium signaling in VMI organoids upon high glucose stimulation. High glucose: 20 mM D-glucose. Each frame was captured every 500ms.

**(M)** Live cell imaging of VI organoids and monocytes exposed to mock or CVB4 ( $2 \times 10^6$  PFU/ml) at 24 hpi and 48 hpi. Scale bar= 100  $\mu$ m.

**(N)** Schematic illustration of the sample preparation for scRNA-seq and snATAC-seq.

**(O)** Chromatin accessibility signals of cell markers for each cluster as analyzed using snATAC-seq.

**(P)** Violin plot analysis of  $\beta$  cell associated genes in  $\beta$  cell cluster of VMI organoids at day 7 after reaggregation and separately cultured cells as analyzed by scRNA-seq.

**(Q)** Violin plot analysis of endothelial cell associated genes in endothelial cell cluster of VMI organoids at day 7 after reaggregation and separately cultured cells as analyzed by scRNA-seq.

N=3 independent biological replicates. Data was presented as mean  $\pm$  STDEV.

\*\*\* $P < 0.001$ .

Figure S5

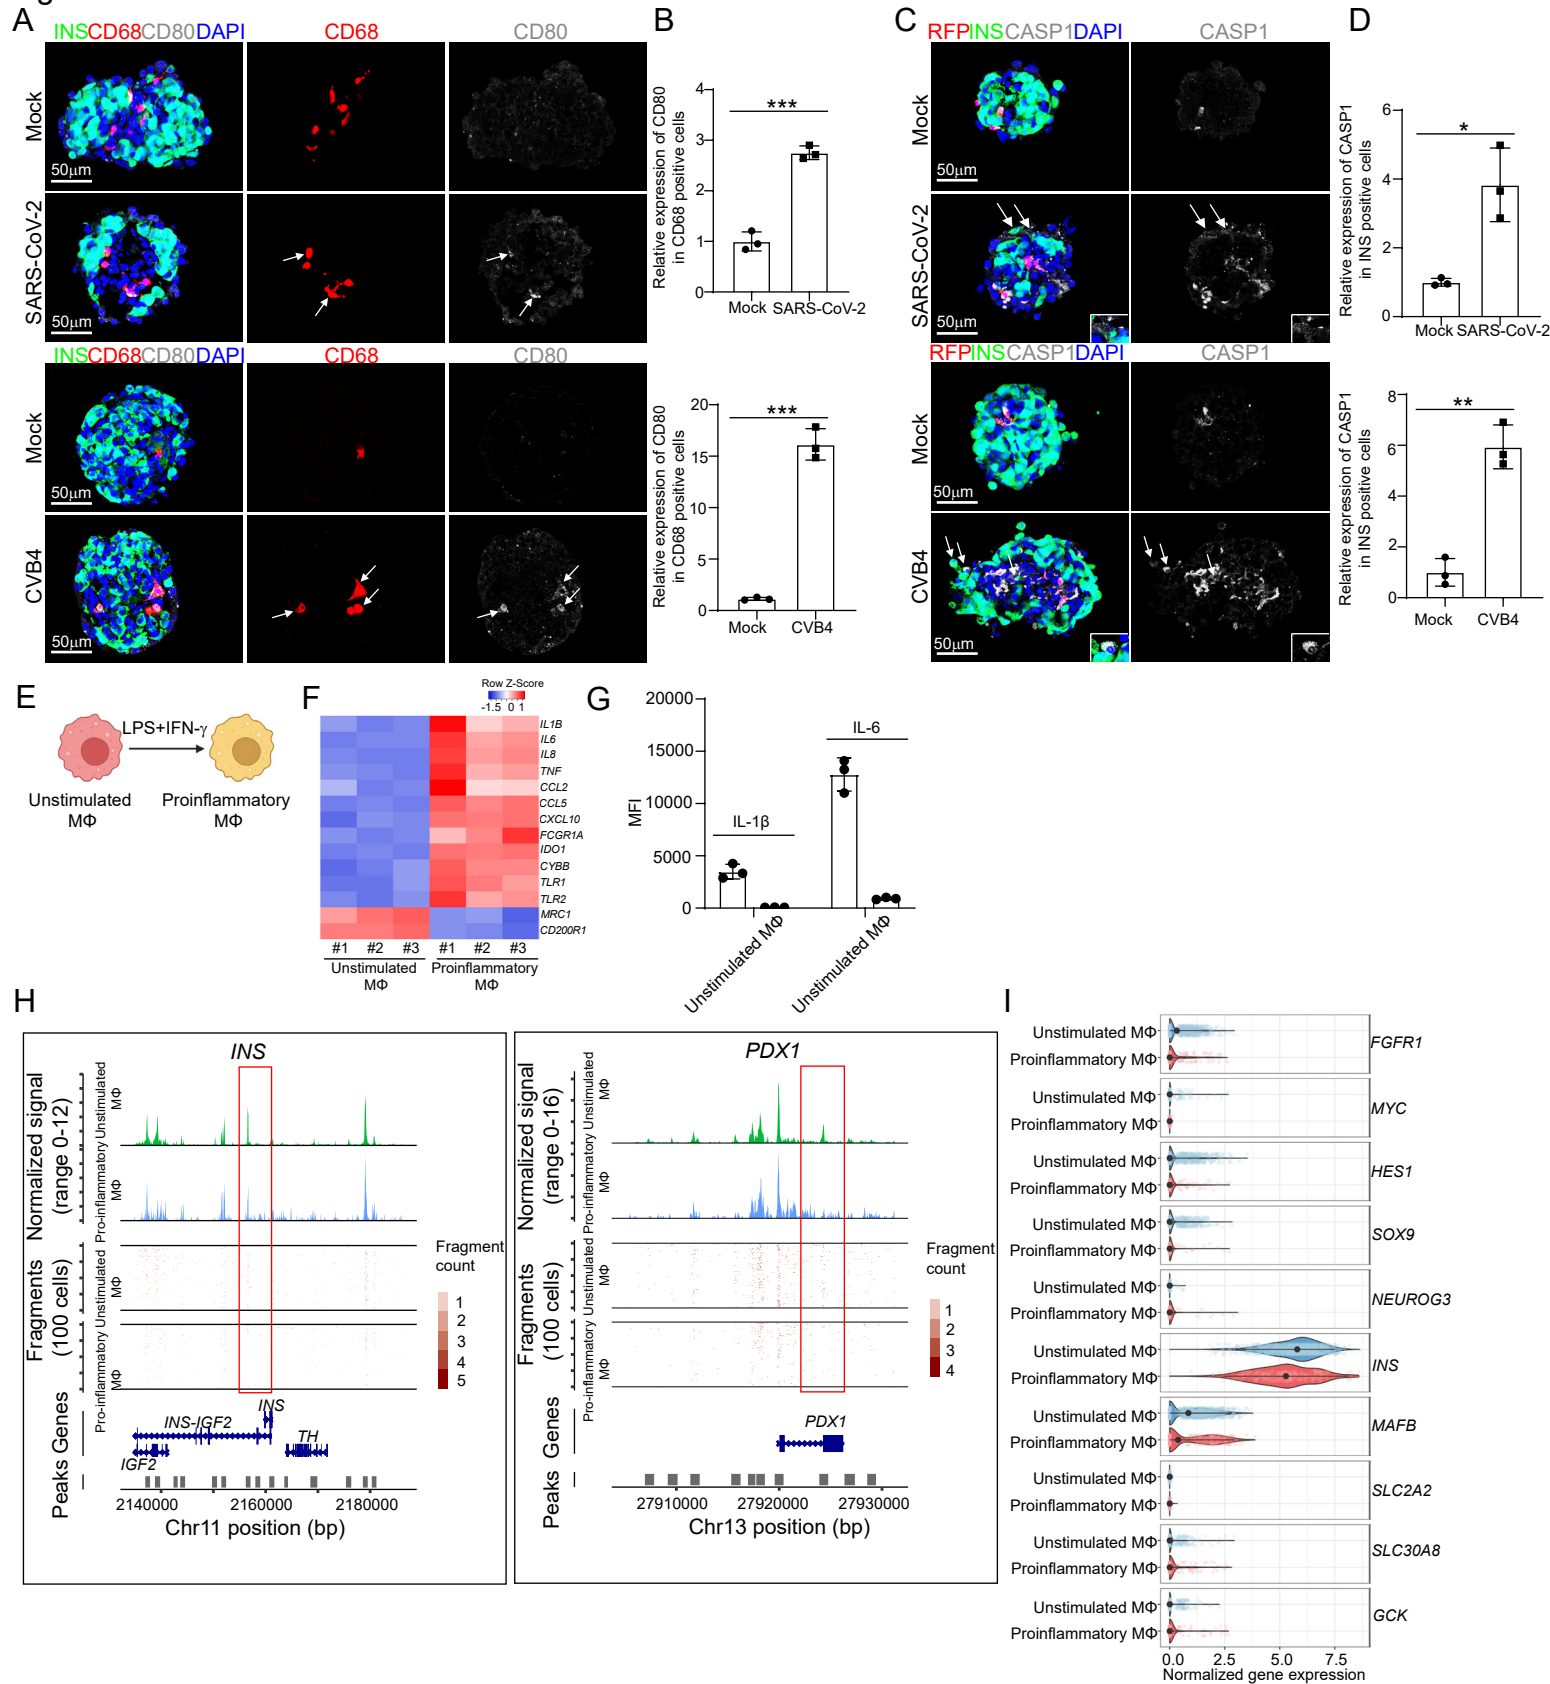

**Figure S5. Activation of proinflammatory macrophages and  $\beta$  cell pyroptosis were detected in hPSC-derived VMI organoids exposed to viruses. Related to Figure 5.**

**(A and B)** Confocal images (A) and quantification (B) of hPSC-derived VMI organoids exposed to viruses or mock conditions stained with antibodies against INS, CD68 and CD80 (SARS-CoV-2: MOI=0.5; CVB4:  $2 \times 10^6$  PFU/ml). Scale bar= 50  $\mu$ m. The white arrows highlight the CD68<sup>+</sup>CD80<sup>+</sup> cells.

**(C and D)** Confocal images (C) and quantification (D) of hPSC-derived VMI organoids exposed to viruses or mock conditions stained with antibodies against INS and CASP1 (SARS-CoV-2: MOI=0.5; CVB4:  $2 \times 10^6$  PFU/ml). Scale bar= 50  $\mu$ m. The white arrows highlight the INS<sup>+</sup>CASP1<sup>+</sup> cells.

**(E)** Schematic illustration of the stimulation of macrophages to proinflammatory macrophages.

**(F)** Heatmap showing the expression of macrophage associated genes in hPSC-derived macrophages with or without 2 days treatment with 100 ng/ml LPS and 20 ng/ml IFN- $\gamma$ .

**(G)** The secretion of cytokines, including IL-1 $\beta$  and IL-6 in the supernatant of hPSC-derived macrophages with or without 2 days treatment with 100 ng/ml LPS and 20 ng/ml IFN- $\gamma$ .

**(H)** Chromatin accessibility signals of the  $\beta$  cluster of VMI organoids at day 7 after reaggregation containing unstimulated macrophages or proinflammatory macrophages as analyzed using snATAC-seq. The normalized signal shows the averaged frequency of sequenced DNA fragments within a genomic region. The fragment shows the frequency of sequenced fragments within a genomic region for individual cells.

**(I)** Jitter plot analysis of  $\beta$  cell dedifferentiation associated genes in  $\beta$  cell cluster of VMI organoids with unstimulated macrophages or proinflammatory macrophages at day 7 after reaggregation as analyzed by scRNA-seq.

N=3 independent biological replicates. Data was presented as mean  $\pm$  STDEV. \* $P < 0.05$ , \*\* $P < 0.01$ , \*\*\* $P < 0.001$ .



Figure S6

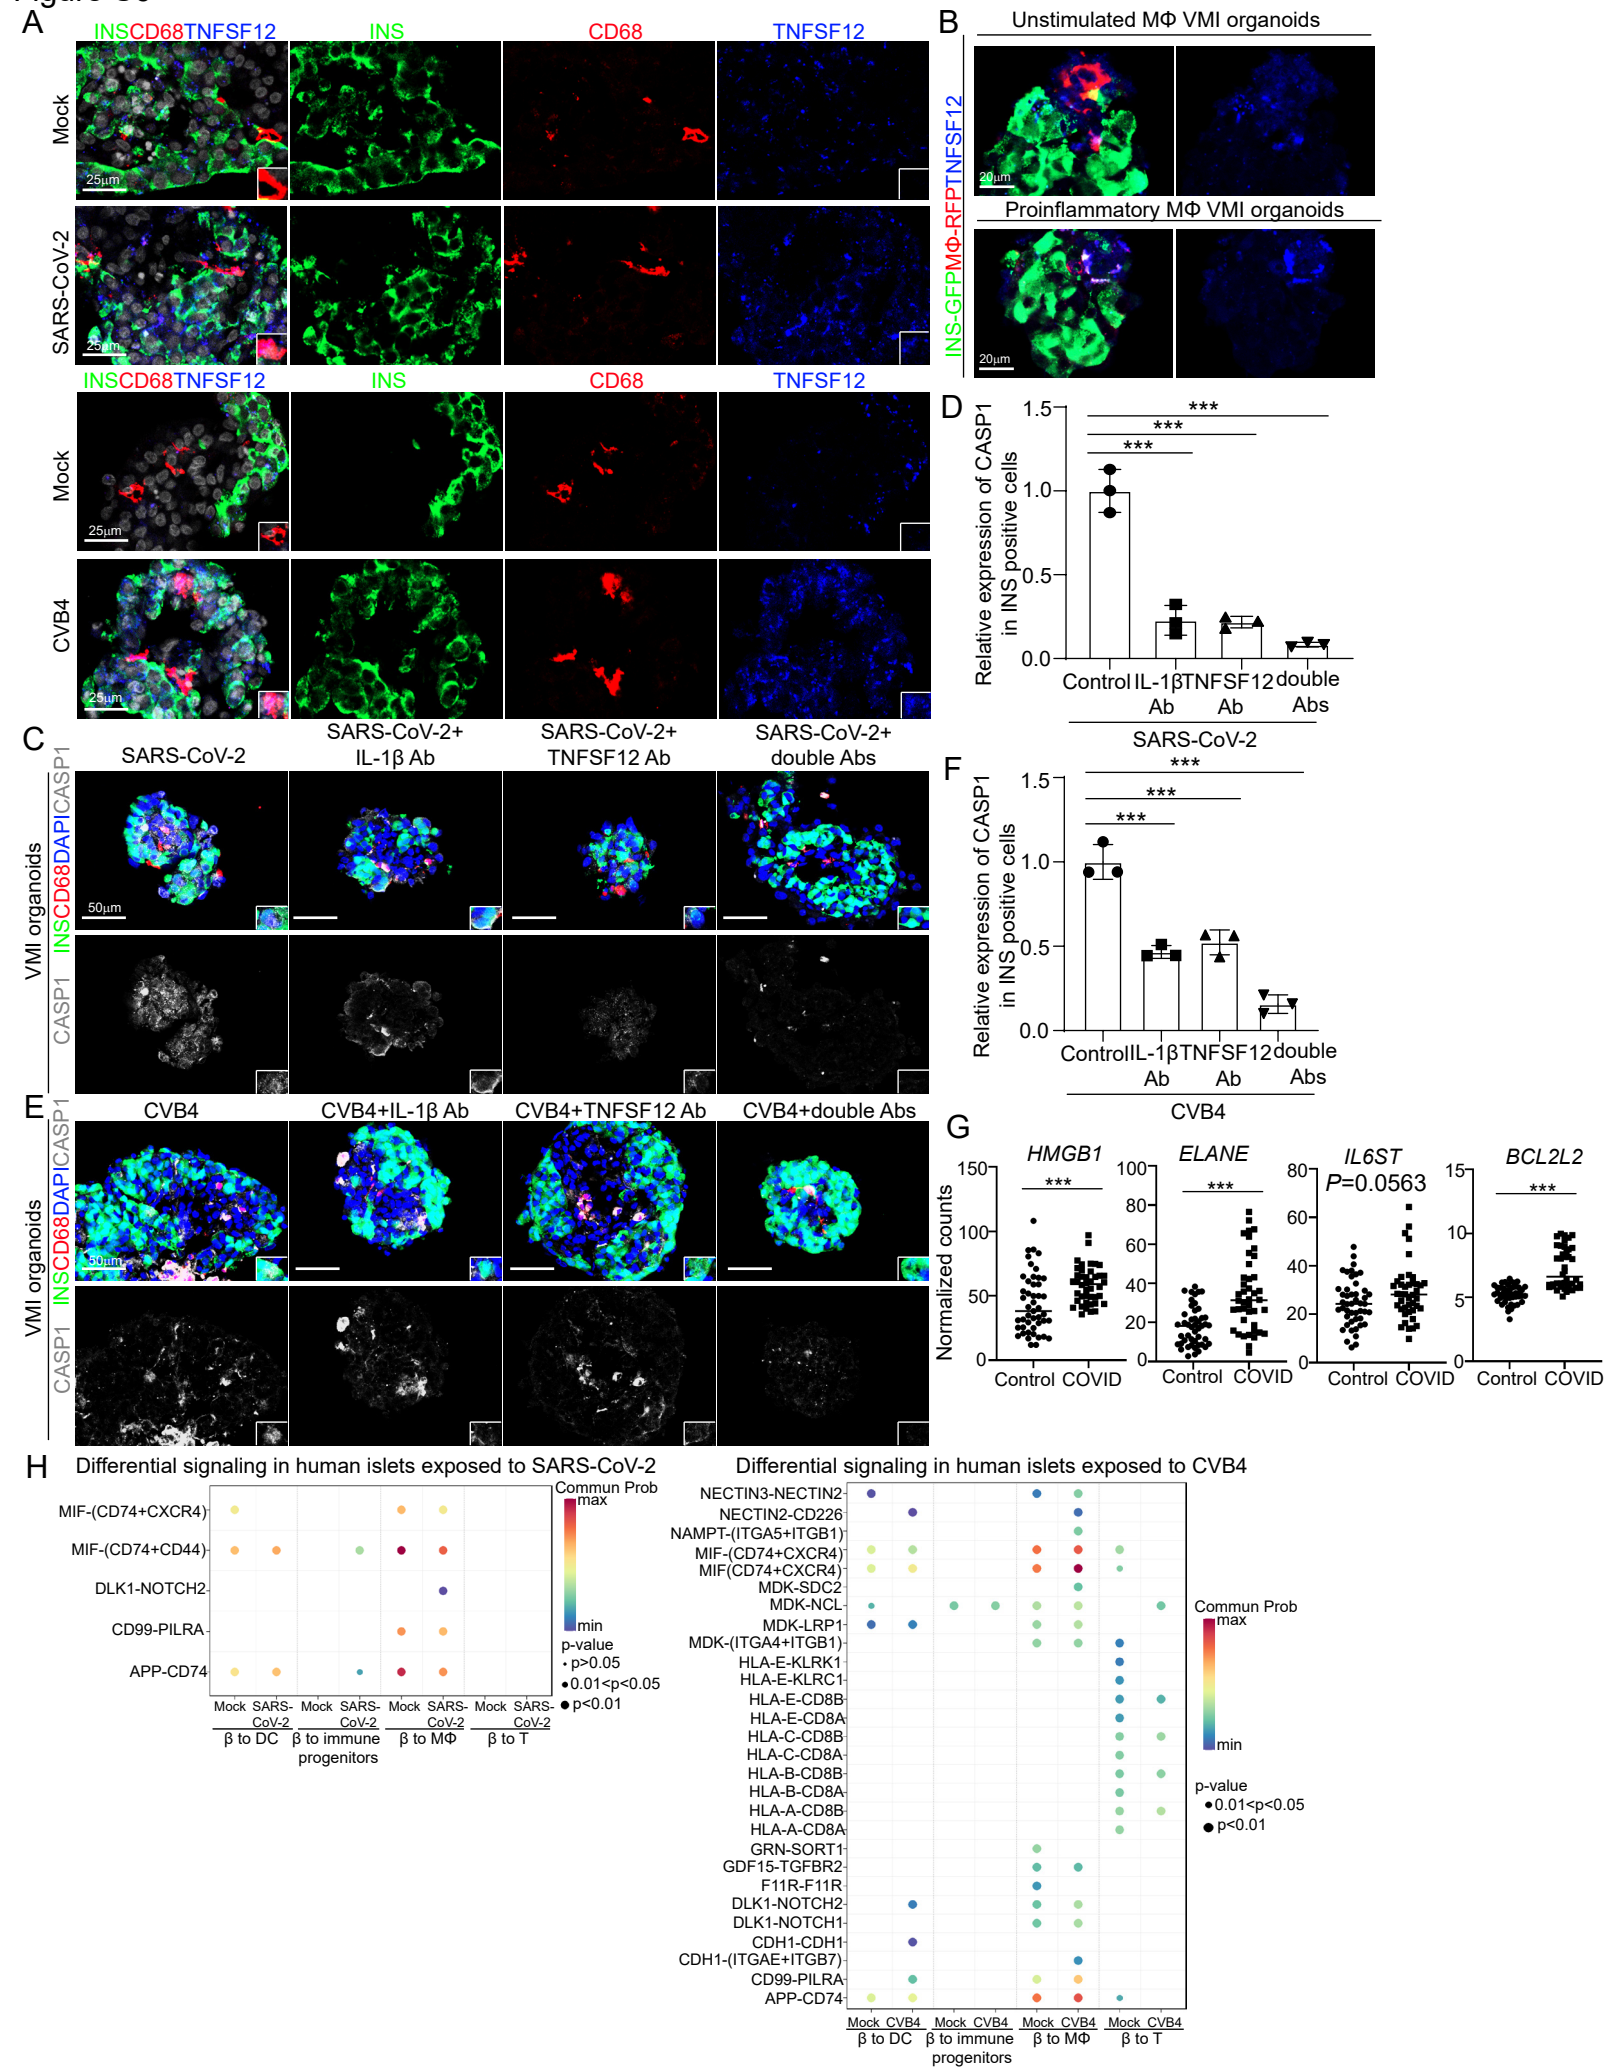

**Figure S6. TNFSF12 expression in human islets exposed to CVB4 or SARS-CoV-2, and VMI organoids with proinflammatory macrophages. Related to Figure 6.**

**(A)** Confocal images of TNFSF12 in human islets exposed to mock, CVB4 ( $2 \times 10^6$  PFU/ml) or SARS-CoV-2 (MOI=0.5). The inserts show a high magnification of cells. Scale bar= 25  $\mu$ m.

**(B)** Confocal images of TNFSF12 in VMI organoids containing unstimulated or pro-inflammatory macrophages at day 7 after reaggregation. Scale bar= 20  $\mu$ m.

**(C and D)** Confocal images (C) and quantification (D) of the CASP1 expression in INS<sup>+</sup> cells of VMI organoids exposed to SARS-CoV-2 (MOI=0.5) and treated with control, 10  $\mu$ g/ml TNFSF12 blocking antibody, 5  $\mu$ g/ml IL-1 $\beta$  blocking antibody or 10  $\mu$ g/ml TNFSF12 + 5  $\mu$ g/ml IL-1 $\beta$  blocking antibodies. The inserts show a high magnification of cells. Scale bar= 50  $\mu$ m.

**(E and F)** Confocal images (E) and quantification (F) of the CASP1 expression in INS<sup>+</sup> cells of VMI organoids exposed to CVB4 ( $2 \times 10^6$  PFU/ml) and treated with control, 10  $\mu$ g/ml TNFSF12 blocking antibody, 5  $\mu$ g/ml IL-1 $\beta$  blocking antibody or 10  $\mu$ g/ml TNFSF12 + 5  $\mu$ g/ml IL-1 $\beta$  blocking antibodies. The inserts show a high magnification of cells. Scale bar= 50  $\mu$ m.

**(G)** Normalized counts of pyroptosis associated genes expression in control or COVID-19 samples examined by GeoMx transcriptomic assays. Each dot represents one count in each ROI.

**(H)** Cell chat analysis showed the interactions from  $\beta$  cells to immune cell subpopulations, including DC cells, immune progenitors, T cells and macrophages in human islets exposed to SARS-CoV-2 (MOI=1) or CVB4 ( $2 \times 10^6$  PFU/ml).

N=3 independent biological replicates. Data was presented as mean  $\pm$  STDEV.

\*\*\* $P < 0.001$ .

**Table S1. Patient information. Related to Figures 1, 2, 6 and Figures S1, S2, S3, S6.**

**Table S2. Antibodies used for immunocytochemistry, intracellular flow cytometry analysis. Related to STAR Methods.**

| Usage          | Antibody                            | Clone #    | Host       | Catalog # | Vendor         | Dilution |
|----------------|-------------------------------------|------------|------------|-----------|----------------|----------|
| Immunostaining | Polyclonal Guinea Pig Anti-Insulin  | Polyclonal | Guinea Pig | #A0564    | Dako           | 1:500    |
| Immunostaining | Glucagon Rabbit Ab                  | Polyclonal | Rabbit     | #2760     | Cell Signaling | 1:1000   |
| Immunostaining | Polyclonal Rabbit Anti-Somatostatin | Polyclonal | Rabbit     | #A0566    | Dako           | 1:1000   |
| Immunostaining | Human CD31/PECAM-1 Antibody         | Polyclonal | Sheep      | #AF806    | R&D Systems    | 1:1000   |
| Immunostaining | Purified anti-human CD68 Antibody   | Monoclonal | Mouse      | #333802   | Biogen         | 1:100    |
| Immunostaining | Cleaved Caspase-1 (Asp297)          | Monoclonal | Rabbit     | #4199     | Cell Signaling | 1:200    |
| Immunostaining | hPDX-1 Affinity purified goat igG   | Polyclonal | Goat       | #AF2419   | R&D Systems    | 1:500    |
| Immunostaining | Nkx6.1 (D8O4R) Rabbit mAb           | Monoclonal | Rabbit     | #54551    | Cell Signaling | 1:500    |
| Flow Cytometry | APC anti-mouse/human CD11b Antibody | Monoclonal | Rat        | #101212   | Biogen         | 1:50     |
| Flow Cytometry | APC anti-human CD206 (MMR) Antibody | Monoclonal | Mouse      | #321109   | Biogen         | 1:50     |
| Flow Cytometry | APC anti-human CD14                 | Monoclonal | Mouse      | #301808   | Biogen         | 1:100    |

|                      |                                                                                       |            |        |                    |                              |        |
|----------------------|---------------------------------------------------------------------------------------|------------|--------|--------------------|------------------------------|--------|
| GeoMx                | Insulin Monoclonal Antibody (ICBTACLS), Alexa Fluor™ 488                              | Monoclonal | Mouse  | # 53-9769-82       | Thermo Fisher Scientific     | 1:200  |
| GeoMx                | Cytokeratin, pan Antibody (AE-1/AE-3) [DyLight 594]                                   | Monoclonal | Mouse  | # NBP2-33200 DL594 | Novus Biological             | 1:200  |
| Immunostaining       | caspase-1 Antibody (14F468)                                                           | Monoclonal | Mouse  | #sc-56036          | Santa Cruz                   | 1:200  |
| Immunostaining       | Enterovirus (Concentrate)                                                             | Monoclonal | Mouse  | #M7064             | Dako                         | 1:500  |
| Immunostaining       | CD163 (D6U1J) Rabbit mAb                                                              | Monoclonal | Rabbit | #93498             | Cell Signaling               | 1:200  |
| Immunostaining       | Anti-PRSS1 antibody produced in rabbit                                                | Polyclonal | Rabbit | #HPA063471         | Sigma Aldrich                | 1:500  |
| GeoMx                | Purified anti-Cytokeratin 19                                                          | Monoclonal | Mouse  | #628502            | Biolegend                    | 1:1000 |
| Immunohistochemistry | Human B7-1/CD80 MAb (Clone 37711)                                                     | Monoclonal | Mouse  | # MAB140-100       | RnD                          | 1:500  |
| Immunostaining       | Alexa Fluor 488 AffiniPure Donkey Anti-Guinea Pig IgG (H+L)                           | Polyclonal | Donkey | #706-545-148       | Jackson Immuno research Labs | 1:500  |
| Immunostaining       | Donkey anti-Mouse IgG (H+L) Highly Cross-Adsorbed Secondary Antibody, Alexa Fluor 594 | Polyclonal | Donkey | #A-21203           | Thermo Fisher Scientific     | 1:500  |
| Immunostaining       | Donkey anti-Rabbit IgG (H+L) Secondary Antibody, Alexa Fluor 594 conjugate            | Polyclonal | Donkey | #A-21207           | Thermo Fisher Scientific     | 1:500  |
| Immunostaining       | Donkey anti-Rabbit IgG (H+L)                                                          | Polyclonal | Donkey | #A-31573           | Thermo Fisher                | 1:500  |

|                |                                                                                            |            |        |          |                          |       |
|----------------|--------------------------------------------------------------------------------------------|------------|--------|----------|--------------------------|-------|
|                | Secondary Antibody, Alexa Fluor 647 conjugate                                              |            |        |          | Scientific               |       |
| Immunostaining | Donkey anti-Mouse IgG (H+L) Secondary Antibody, Alexa Fluor 647                            | Polyclonal | Donkey | #A-31571 | Thermo Fisher Scientific | 1:500 |
| Immunostaining | Donkey anti-Goat IgG (H+L) Cross-Adsorbed Secondary Antibody, Alexa Fluor 647              | Polyclonal | Donkey | #A-21447 | Thermo Fisher Scientific | 1:500 |
| Immunostaining | Donkey anti-Sheep IgG (H+L) Cross-Adsorbed Secondary Antibody, Alexa Fluor 647             | Polyclonal | Donkey | #A-21448 | Thermo Fisher Scientific | 1:500 |
| Immunostaining | Donkey anti-Mouse IgG (H+L) Highly Cross-Adsorbed Secondary Antibody, Alexa Fluor Plus 405 | Polyclonal | Donkey | #A48257  | Thermo Fisher Scientific | 1:500 |

**Table S3. Primers used for qRT-PCR. Related to STAR Methods.**

| <b>Primer name</b>  | <b>Sequence</b>               |
|---------------------|-------------------------------|
| <i>ACTB-Forward</i> | <i>CGTCACCAACTGGGACGACA</i>   |
| <i>ACTB-Reverse</i> | <i>CTTCTCGCGGTTGGCCTTGG</i>   |
| <i>ETV2-F</i>       | <i>GAAGGAGCCAAATTAGGCTTCT</i> |
| <i>ETV2-R</i>       | <i>GAGCTTGTACCTTTCCAGCAT</i>  |
